# Supplementary material for: Poly-acetylated chromatin signatures are preferred epitopes for site-specific histone H4 acetyl antibodies
Source: PubMed Central journal article supplement — Sci Rep. 2012 Jul 3;2:489. doi: 10.1038/srep00489 (PMC3388470; doi:10.1038/srep00489), 2012-07-03
Supplement: srep00489-s1.pdf [file srep00489-s1.pdf]

## **Poly-acetylated chromatin signatures are preferred epitopes for site-specific histone H4 acetyl antibodies**

Scott B. Rothbart<sup>1,2</sup>, Shu Lin<sup>3</sup>, Laura-Mae Britton<sup>3</sup>, Krzysztof Krajewski<sup>1</sup>, Michael-C. Keogh<sup>4</sup>, Benjamin A. Garcia<sup>3</sup>, and Brian D. Strahl<sup>1,2,\*</sup>

<sup>1</sup>Department of Biochemistry & Biophysics and the <sup>2</sup>Lineberger Comprehensive Cancer Center, University of North Carolina at Chapel Hill, Chapel Hill, NC 27599, USA.

<sup>3</sup>Department of Molecular Biology, Princeton University, Princeton, NJ 08544, USA.

<sup>4</sup>Department of Cell Biology, Albert Einstein College of Medicine, New York, NY 10461, USA.

\*Correspondence: [brian\\_strahl@med.unc.edu](mailto:brian_strahl@med.unc.edu)

### **SUPPLEMENTARY INFORMATION**

Supplemental Figures 1-2 – Expanded array results

Supplemental Figure 3 – Expanded mass spectrometry results

Supplemental Table 1 – Peptide List

Supplemental Table 2 – Antibodies used in this study

Supplemental Figure Legends

# Supplemental Figure 1. Rothbart *et al*

## H3 peptides

## H4 peptides

## H2A/H2B peptides

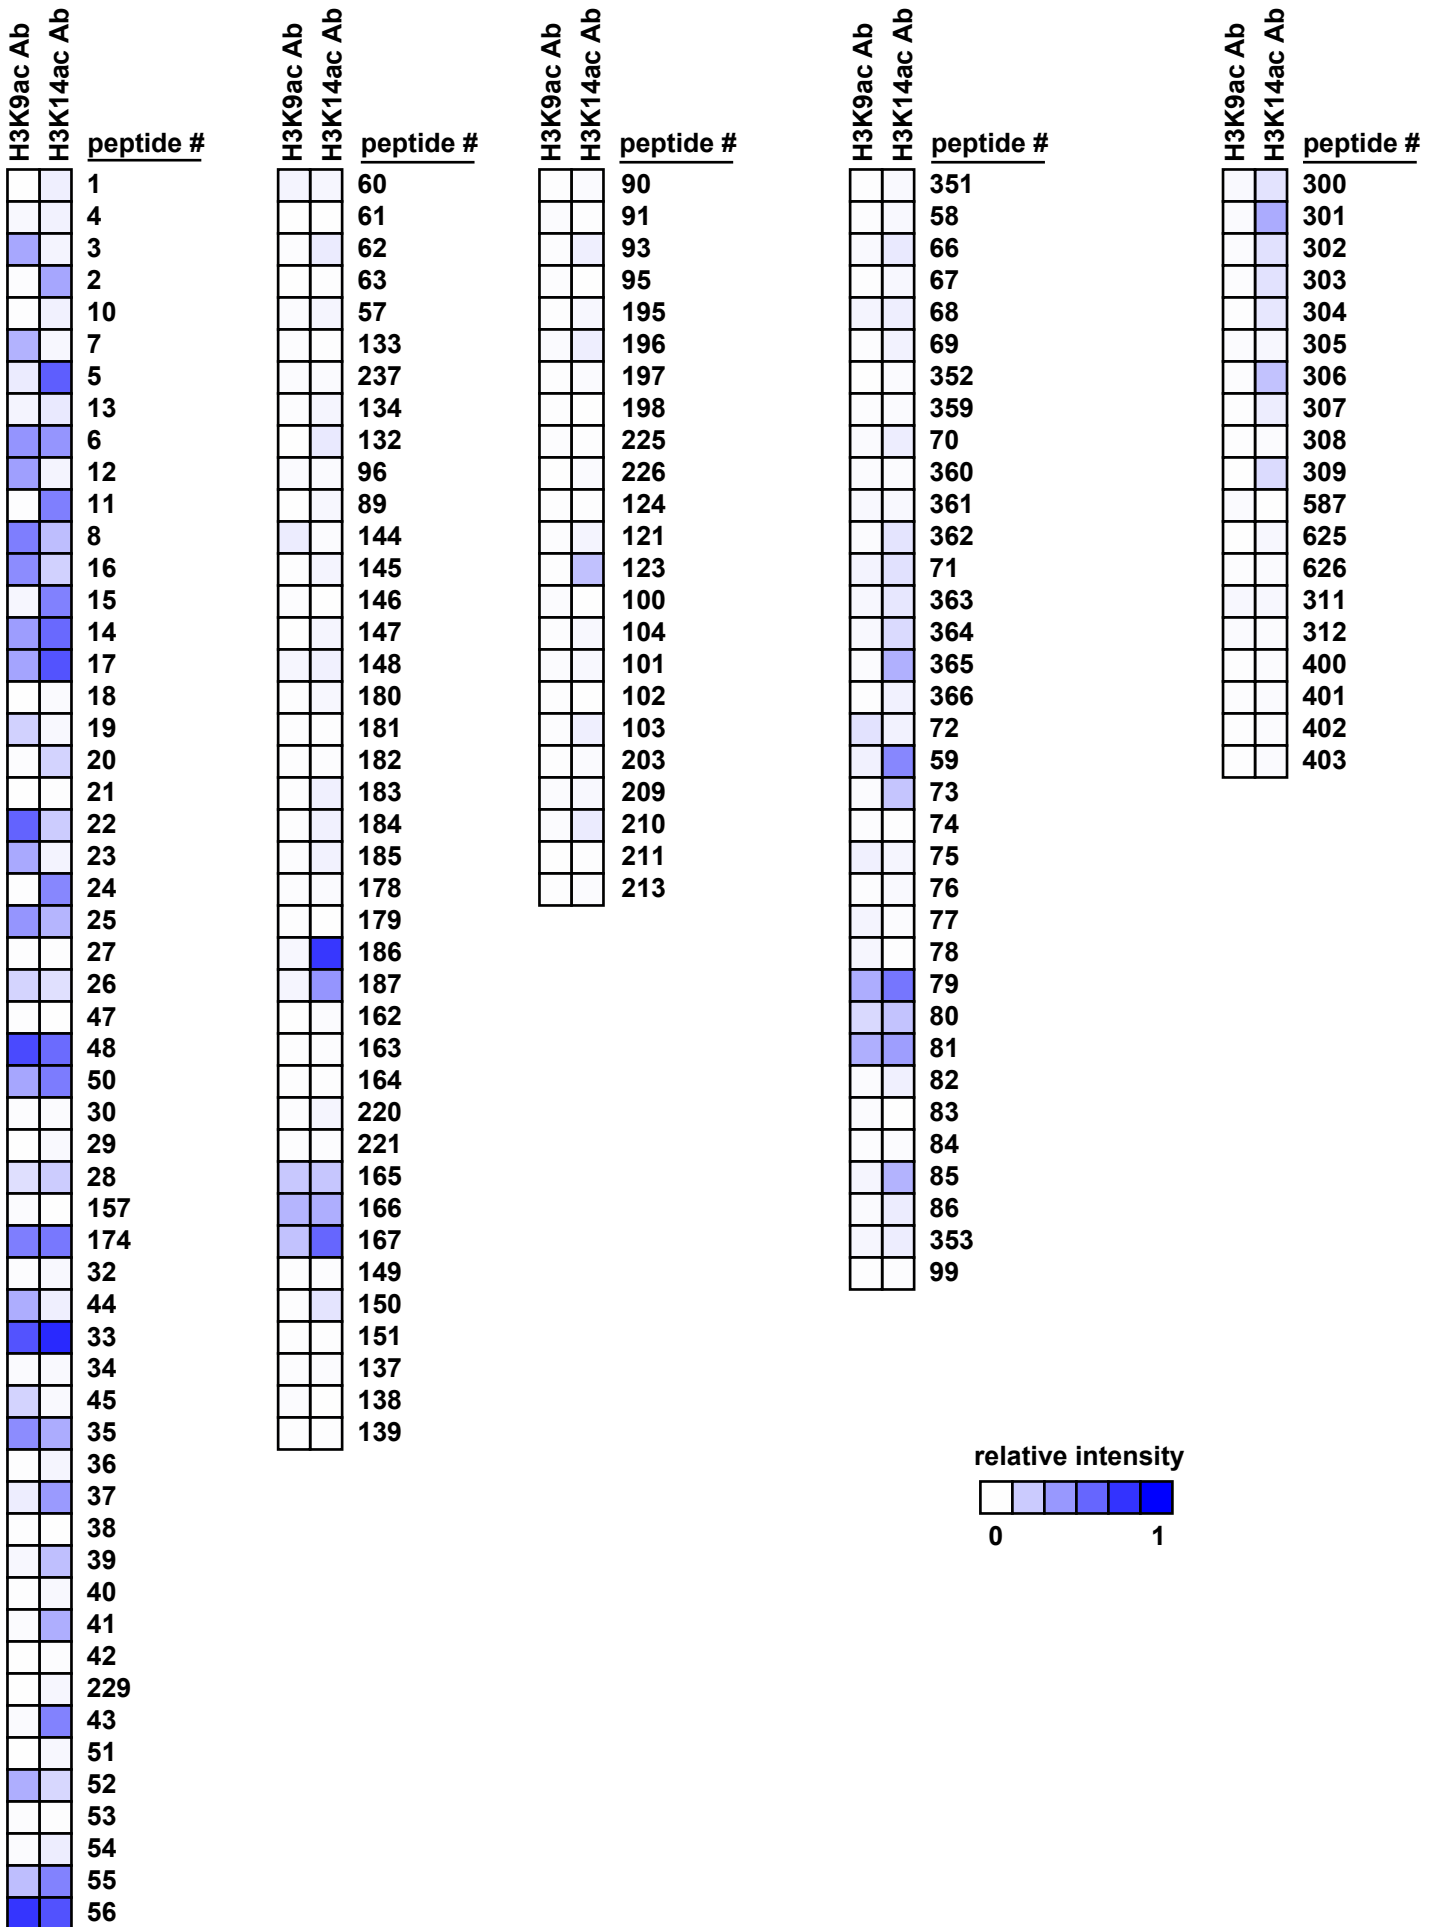

# Supplemental Figure 2. Rothbart et al

## H3 peptides

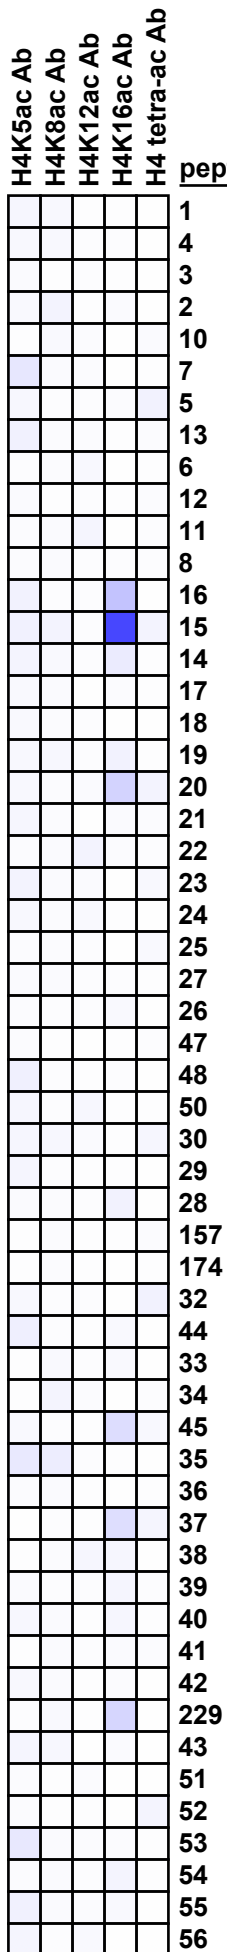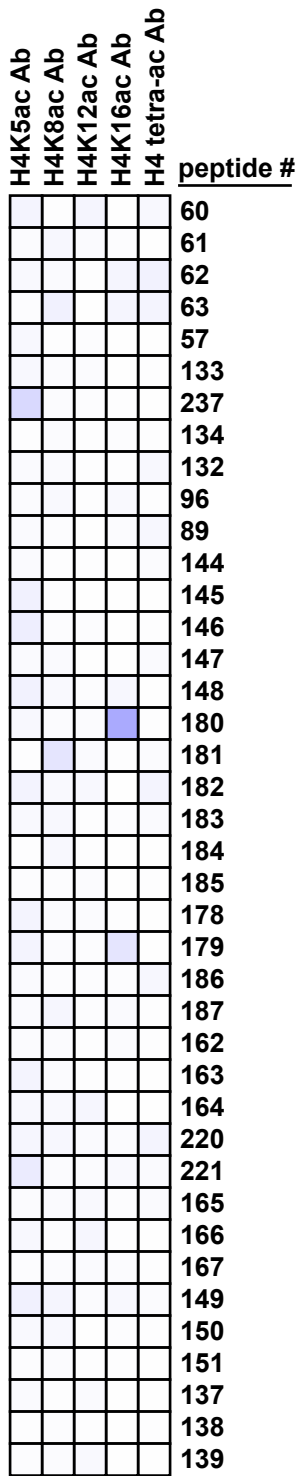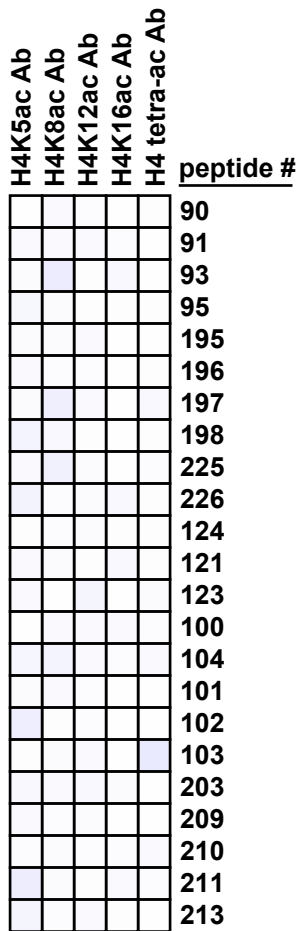

## H4 peptides

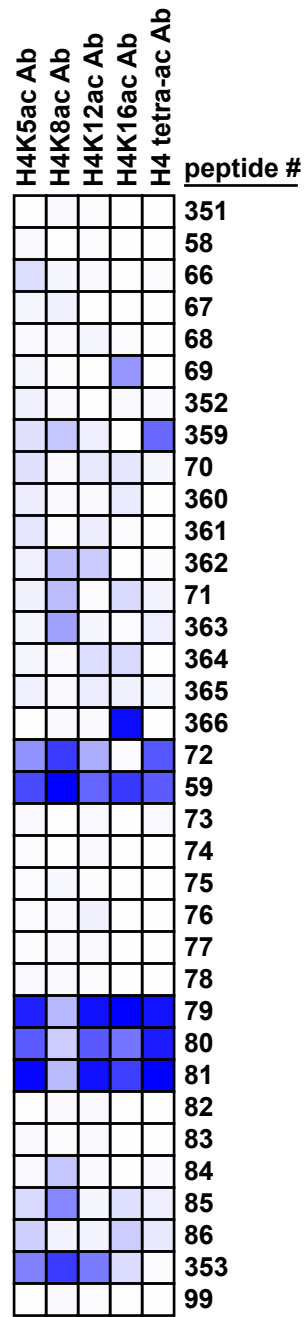

## H2A/H2B peptides

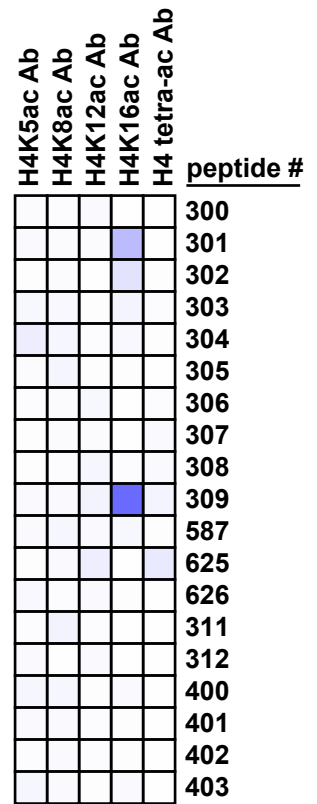

relative intensity

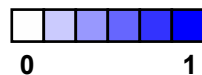

# Supplemental Figure 3. Rothbart *et al*

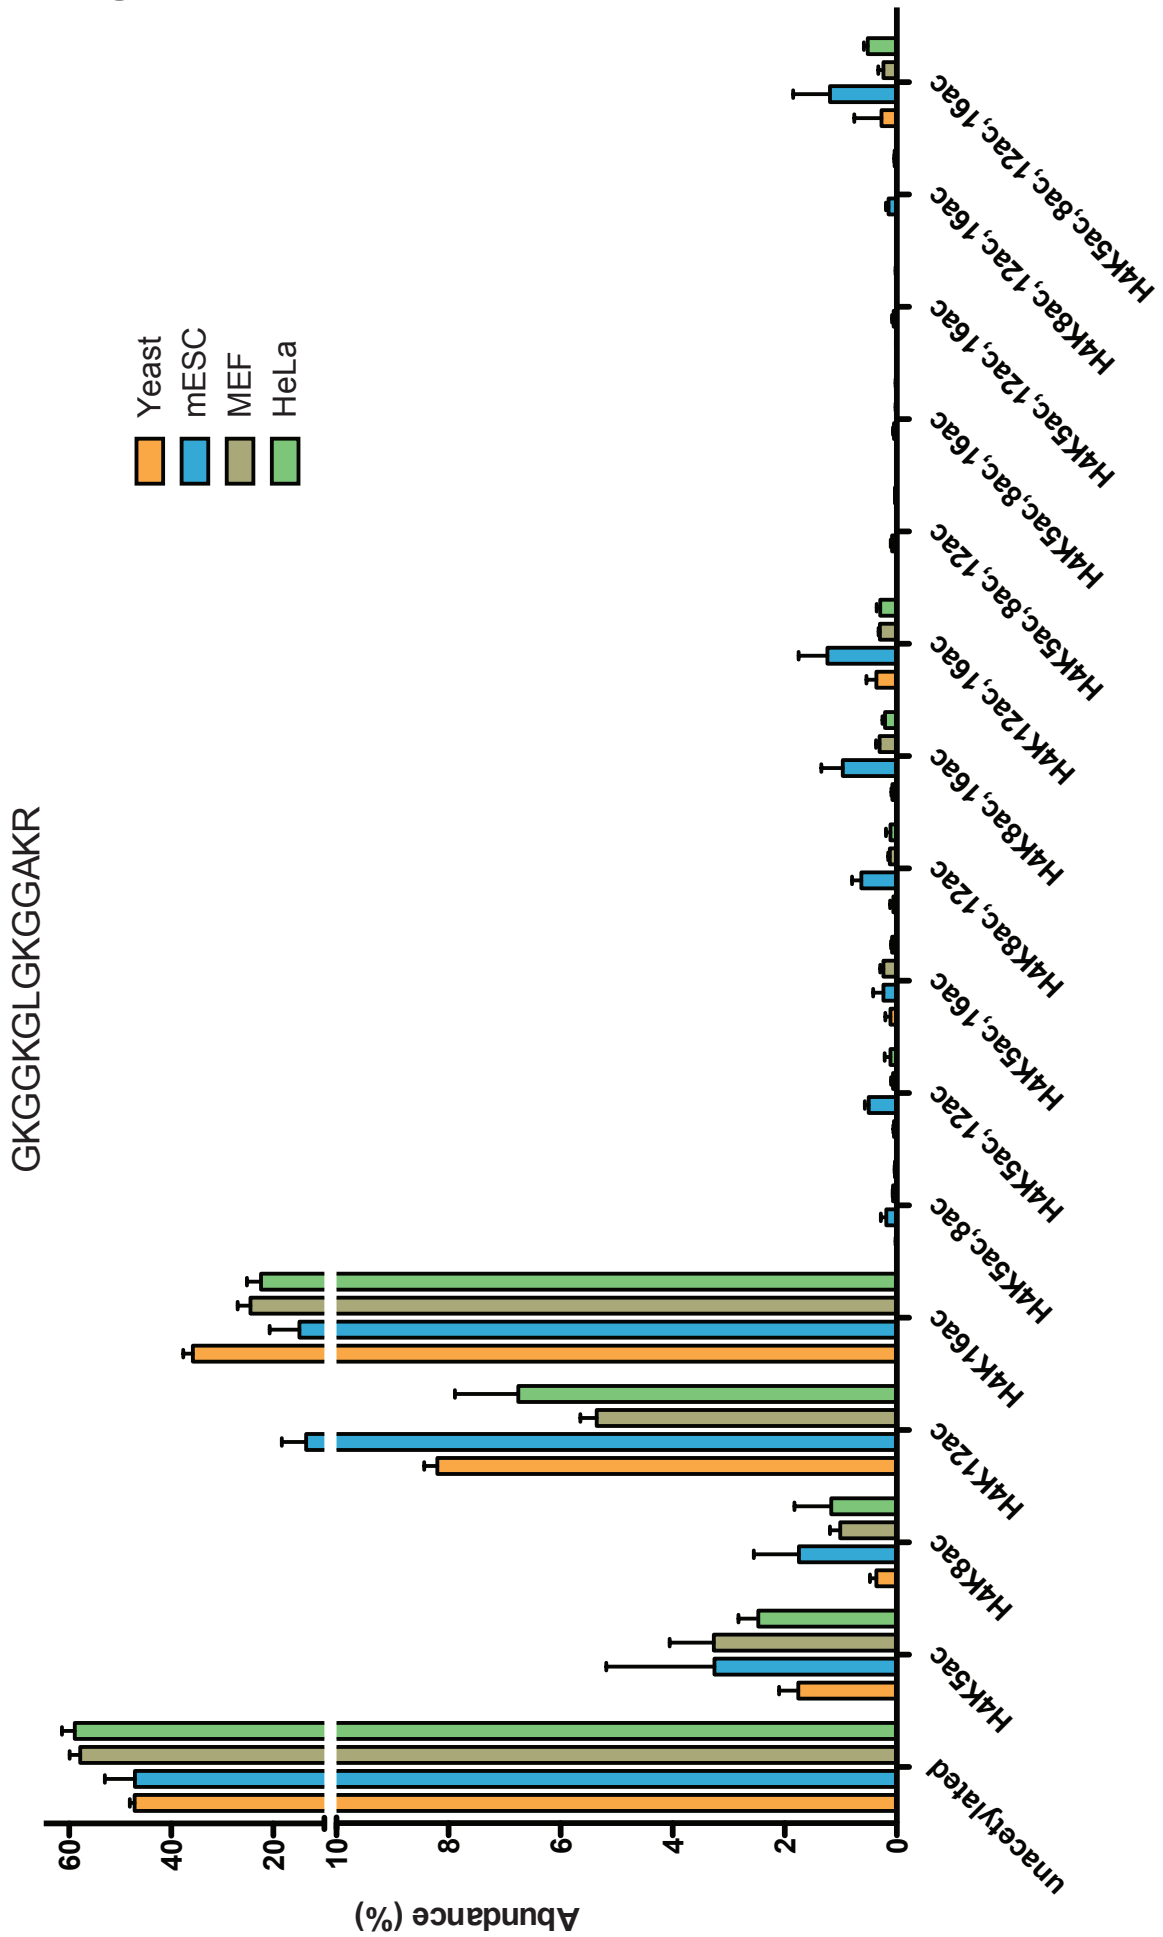

**Supplemental Table 1. List of Peptides**

| Peptide # | Sequence                                                                                                                                                  | annotation                                     |
|-----------|-----------------------------------------------------------------------------------------------------------------------------------------------------------|------------------------------------------------|
| 1         | H3 1-20 AR <sup>2</sup> TK <sup>4</sup> QTAR <sup>8</sup> K <sup>9</sup> S <sup>10</sup> TGGK <sup>14</sup> APRK <sup>18</sup> QL-K(Biot)-NH <sub>2</sub> | H3 (1-20)                                      |
| 2         | H3 1-20 ARTKQTARKSTGGK(Ac)APRKQL-K(Biot)-NH <sub>2</sub>                                                                                                  | H3K14ac                                        |
| 3         | H3 1-20 ARTKQTARK(Ac)STGGKAPRKQL-K(Biot)-NH <sub>2</sub>                                                                                                  | H3K9ac                                         |
| 4         | H3 1-20 ARTK(Ac)QTARKSTGGKAPRKQL-K(Biot)-NH <sub>2</sub>                                                                                                  | H3K4ac                                         |
| 5         | H3 1-20 ARTK(Ac)QTARKSTGGK(Ac)APRKQL-K(Biot)-NH <sub>2</sub>                                                                                              | H3K4ac + K14ac                                 |
| 6         | H3 1-20 ARTKQTARK(Ac)STGGK(Ac)APRKQL-K(Biot)-NH <sub>2</sub>                                                                                              | H3K9ac + K14ac                                 |
| 7         | H3 1-20 ARTK(Ac)QTARK(Ac)STGGKAPRKQL-K(Biot)-NH <sub>2</sub>                                                                                              | H3K4ac + K9ac                                  |
| 8         | H3 1-20 ARTK(Ac)QTARK(Ac)STGGK(Ac)APRKQL-K(Biot)-NH <sub>2</sub>                                                                                          | H3K4ac + K9ac + K14ac                          |
| 10        | H3 1-20 ARTKQTARKSTGGKAPRK(Ac)QL-K(Biot)-NH <sub>2</sub>                                                                                                  | H3K18ac                                        |
| 11        | H3 1-20 ARTKQTARKSTGGK(Ac)APRK(Ac)QL-K(Biot)-NH <sub>2</sub>                                                                                              | H3K14ac + K18ac                                |
| 12        | H3 1-20 ARTKQTARK(Ac)STGGKAPRK(Ac)QL-K(Biot)-NH <sub>2</sub>                                                                                              | H3K9ac + K18ac                                 |
| 13        | H3 1-20 ARTK(Ac)QTARKSTGGKAPRK(Ac)QL-K(Biot)-NH <sub>2</sub>                                                                                              | H3K4ac + K18ac                                 |
| 14        | H3 1-20 ARTKQTARK(Ac)STGGK(Ac)APRK(Ac)QL-K(Biot)-NH <sub>2</sub>                                                                                          | H3K9ac + K14ac + K18ac                         |
| 15        | H3 1-20 ARTK(Ac)QTARKSTGGK(Ac)APRK(Ac)QL-K(Biot)-NH <sub>2</sub>                                                                                          | H3K4ac + K14ac + K18ac                         |
| 16        | H3 1-20 ARTK(Ac)QTARK(Ac)STGGKAPRK(Ac)QL-K(Biot)-NH <sub>2</sub>                                                                                          | H3K4ac + K9ac + K18ac                          |
| 17        | H3 1-20 ARTK(Ac)QTARK(Ac)STGGK(Ac)APRK(Ac)QL-K(Biot)-NH <sub>2</sub>                                                                                      | H3K4ac + K9ac + K14ac + K18ac                  |
| 18        | H3 1-20 ARTK(Me <sub>3</sub> )QTARKSTGGKAPRKQL-K(Biot)-NH <sub>2</sub>                                                                                    | H3K4me3                                        |
| 19        | H3 1-20 ARTK(Me <sub>3</sub> )QTARK(Ac)STGGKAPRKQL-K(Biot)-NH <sub>2</sub>                                                                                | H3K4me3 + K9ac                                 |
| 20        | H3 1-20 ARTK(Me <sub>3</sub> )QTARKSTGGK(Ac)APRKQL-K(Biot)-NH <sub>2</sub>                                                                                | H3K4me3 + K14ac                                |
| 21        | H3 1-20 ARTK(Me <sub>3</sub> )QTARKSTGGKAPRK(Ac)QL-K(Biot)-NH <sub>2</sub>                                                                                | H3K4me3 + K18ac                                |
| 22        | H3 1-20 ARTK(Me <sub>3</sub> )QTARK(Ac)STGGK(Ac)APRKQL-K(Biot)-NH <sub>2</sub>                                                                            | H3K4me3 + K9ac + K14ac                         |
| 23        | H3 1-20 ARTK(Me <sub>3</sub> )QTARK(Ac)STGGKAPRK(Ac)QL-K(Biot)-NH <sub>2</sub>                                                                            | H3K4me3 + K9ac + K18ac                         |
| 24        | H3 1-20 ARTK(Me <sub>3</sub> )QTARKSTGGK(Ac)APRK(Ac)QL-K(Biot)-NH <sub>2</sub>                                                                            | H3K4me3 + K14ac + K18ac                        |
| 25        | H3 1-20 ARTK(Me <sub>3</sub> )QTARK(Ac)STGGK(Ac)APRK(Ac)QL-K(Biot)-NH <sub>2</sub>                                                                        | H3K4me3 + K9ac + K14ac + K18ac                 |
| 26        | H3 1-20 ARpTK(Me <sub>3</sub> )QTARK(Ac)STGGK(Ac)APRK(Ac)QL-K(Biot)-NH <sub>2</sub>                                                                       | H3T3p + K4me3 + K9ac + K14ac + K18ac           |
| 27        | H3 1-20 ARpTK(Me <sub>3</sub> )QTARKSTGGKAPRKQL-K(Biot)-NH <sub>2</sub>                                                                                   | H3T3p + K4me3                                  |
| 28        | H3 1-20 AR(Me <sub>2</sub> a)pTK(Me <sub>3</sub> )QTARK(Ac)STGGK(Ac)APRK(Ac)QL-K(Biot)-NH <sub>2</sub>                                                    | H3R2me2a + T3p + K4me3 + K9ac + K14ac + K18ac  |
| 29        | H3 1-20 AR(Me <sub>2</sub> a)pTK(Me <sub>3</sub> )QTARKSTGGKAPRKQL-K(Biot)-NH <sub>2</sub>                                                                | H3R2me2a + T3p + K4me3                         |
| 30        | H3 1-20 AR(Me <sub>2</sub> a)TK(Me <sub>3</sub> )QTARKSTGGKAPRKQL-K(Biot)-NH <sub>2</sub>                                                                 | H3R2me2a + K4me3                               |
| 32        | H3 1-20 ARTK(Me <sub>2</sub> )QTARKSTGGKAPRKQL-K(Biot)-NH <sub>2</sub>                                                                                    | H3K4me2                                        |
| 33        | H3 1-20 ARTK(Me <sub>2</sub> )QTARK(Ac)STGGK(Ac)APRK(Ac)QL-K(Biot)-NH <sub>2</sub>                                                                        | H3K4me2 + K9ac + K14ac + K18ac                 |
| 34        | H3 1-20 ARTK(Me)QTARKSTGGKAPRKQL-K(Biot)-NH <sub>2</sub>                                                                                                  | H3K4me1                                        |
| 35        | H3 1-20 ARTK(Me)QTARK(Ac)STGGK(Ac)APRK(Ac)QL-K(Biot)-NH <sub>2</sub>                                                                                      | H3K4me1 + K9ac + K14ac + K18ac                 |
| 36        | H3 1-20 ARTKQTARKpSTGGKAPRKQL-K(Biot)-NH <sub>2</sub>                                                                                                     | H3S10p                                         |
| 37        | H3 1-20 ARTK(Ac)QTARK(Ac)pSTGGK(Ac)APRK(Ac)QL-K(Biot)-NH <sub>2</sub>                                                                                     | H3K4ac + K9ac + S10p + K14ac + K18ac           |
| 38        | H3 1-20 ARTK(Me <sub>3</sub> )QTARKpSTGGKAPRKQL-K(Biot)-NH <sub>2</sub>                                                                                   | H3K4me3 + S10p                                 |
| 39        | H3 1-20 ARTK(Me <sub>3</sub> )QTARK(Ac)pSTGGK(Ac)APRK(Ac)QL-K(Biot)-NH <sub>2</sub>                                                                       | H3K4me3 + K9ac + S10p + K14ac + K18ac          |
| 40        | H3 1-20 AR(Me <sub>2</sub> a)TK(Me <sub>3</sub> )QTARKpSTGGKAPRKQL-K(Biot)-NH <sub>2</sub>                                                                | H3R2me2a + K4me3 + S10p                        |
| 41        | H3 1-20 AR(Me <sub>2</sub> a)TK(Me <sub>3</sub> )QTARK(Ac)pSTGGK(Ac)APRK(Ac)QL-K(Biot)-NH <sub>2</sub>                                                    | H3R2me2a + K4me3 + K9ac + S10p + K14ac + K18ac |
| 42        | H3 1-20 ARTKQTARK(Me <sub>3</sub> )STGGKAPRKQL-K(Biot)-NH <sub>2</sub>                                                                                    | H3K9me3                                        |
| 43        | H3 1-20 ARTK(Ac)QTARK(Me <sub>3</sub> )STGGK(Ac)APRK(Ac)QL-K(Biot)-NH <sub>2</sub>                                                                        | H3K4ac + K9me3 + K14ac + K18ac                 |
| 44        | H3 1-20 ARTK(Me <sub>2</sub> )QTARK(Ac)STGGKAPRK(Ac)QL-K(Biot)-NH <sub>2</sub>                                                                            | H3K4me2 + K9ac + K18ac                         |

|     |          |                                                                                                                                    |                                                |
|-----|----------|------------------------------------------------------------------------------------------------------------------------------------|------------------------------------------------|
| 45  | H3 1-20  | ARTK(Me)QTARK(Ac)STGGKAPRK(Ac)QL-K(Biot)-NH <sub>2</sub>                                                                           | H3K4me1 + K9ac + K18ac                         |
| 47  | H3 1-20  | AR(Me <sub>2</sub> a)TKQTARKSTGGKAPRKQL-K(Biot)-NH <sub>2</sub>                                                                    | H3R2me2a                                       |
| 48  | H3 1-20  | AR(Me <sub>2</sub> a)TK(Ac)QTARK(Ac)STGGK(Ac)APRK(Ac)QL-K(Biot)-NH <sub>2</sub>                                                    | H3R2me2a + K4ac + K9ac + K14ac + K18ac         |
| 50  | H3 1-20  | AR(Me <sub>2</sub> a)TK(Me <sub>3</sub> )QTARK(Ac)STGGK(Ac)APRK(Ac)QL-K(Biot)-NH <sub>2</sub>                                      | H3R2me2a + K4me3 + K9ac + K14ac + K18ac        |
| 51  | H3 1-20  | AR(Me)TK(Me <sub>3</sub> )QTARKSTGGKAPRKQL-K(Biot)-NH <sub>2</sub>                                                                 | H3R2me1 + K4me3                                |
| 52  | H3 1-20  | AR(Me)TK(Me <sub>3</sub> )QTARK(Ac)STGGK(Ac)APRK(Ac)QL-K(Biot)-NH <sub>2</sub>                                                     | H3R2me1 + K4me3 + K9ac + K14ac + K18ac         |
| 53  | H3 1-20  | ACitTKQTARKSTGGKAPRKQL-K(Biot)-NH <sub>2</sub>                                                                                     | H3Cit2                                         |
| 54  | H3 1-20  | ACitTK(Me <sub>3</sub> )QTARKSTGGKAPRKQL-K(Biot)-NH <sub>2</sub>                                                                   | H3Cit2 + K4me3                                 |
| 55  | H3 1-20  | ACitTK(Me <sub>3</sub> )QTARK(Ac)STGGK(Ac)APRK(Ac)QL-K(Biot)-NH <sub>2</sub>                                                       | H3Cit2 + K4me3 + K9ac + K14ac + K18ac          |
| 56  | H3 1-20  | ACitTK(Ac)QTARK(Ac)STGGK(Ac)APRK(Ac)QL-K(Biot)-NH <sub>2</sub>                                                                     | H3Cit2 + K4ac + K9ac + K14ac + K18ac           |
| 57  | H3 1-20  | ARpTKQTARKSTGGKAPRKQL-Peg-K(Biot)-NH <sub>2</sub>                                                                                  | H3T3p                                          |
| 58  | H4 1-23  | Ac-SGRGK <sup>5</sup> GGKGLGKGGAKRHRKVLR-Peg-Biot                                                                                  | H4 (1-23)                                      |
| 59  | H4 1-23  | Ac-SGRGK(Ac)GGK(Ac)GLGK(Ac)GGAK(Ac)RHRKVLR-Peg-Biot                                                                                | H4K5ac + K8ac + K12ac + K16ac                  |
| 60  | H3 1-20  | AR(Me <sub>2</sub> a)TK(Me <sub>2</sub> )QTARKSTGGKAPRKQL-K(Biot)-NH <sub>2</sub>                                                  | H3R2me2a + K4me2                               |
| 61  | H3 1-20  | AR(Me <sub>2</sub> s)TK(Me <sub>2</sub> )QTARKSTGGKAPRKQL-K(Biot)-NH <sub>2</sub>                                                  | H3R2me2s + K4me2                               |
| 62  | H3 1-20  | AR(Me)TK(Me <sub>2</sub> )QTARKSTGGKAPRKQL-K(Biot)-NH <sub>2</sub>                                                                 | H3R2me1 + K4me2                                |
| 63  | H3 1-20  | ACitTK(Me <sub>2</sub> )QTARKSTGGKAPRKQL-K(Biot)-NH <sub>2</sub>                                                                   | H3Cit2 + K4me2                                 |
| 66  | H4 1-23  | Ac-SGRGK(Ac)GGKGLGKGGAKRHRKVLR-Peg-Biot                                                                                            | H4K5ac                                         |
| 67  | H4 1-23  | Ac-SGRGKGGK(Ac)GLGKGGAKRHRKVLR-Peg-Biot                                                                                            | H4K8ac                                         |
| 68  | H4 1-23  | Ac-SGRGKGGKGLGK(Ac)GGAKRHRKVLR-Peg-Biot                                                                                            | H4K12ac                                        |
| 69  | H4 1-23  | Ac-SGRGKGGKGLGKGGAK(Ac)RHRKVLR-Peg-Biot                                                                                            | H4K16ac                                        |
| 70  | H4 1-23  | Ac-SGRGK(Ac)GGKGLGK(Ac)GGAKRHRKVLR-Peg-Biot                                                                                        | H4K5ac + K12ac                                 |
| 71  | H4 1-23  | Ac-SGRGKGGK(Ac)GLGKGGAK(Ac)RHRKVLR-Peg-Biot                                                                                        | H4K8ac + K16ac                                 |
| 72  | H4 1-23  | Ac-SGRGK(Ac)GGK(Ac)GLGK(Ac)GGAKRHRKVLR-Peg-Biot                                                                                    | H4K5ac + K8ac + K12ac                          |
| 73  | H4 1-23  | Ac-SGR(Me <sub>2</sub> a)GKGGKGLGKGGAKRHRKVLR-K(Biot)-NH <sub>2</sub>                                                              | H4R3me2a                                       |
| 74  | H4 1-23  | Ac-SGR(Me <sub>2</sub> s)GKGGKGLGKGGAKRHRKVLR-K(Biot)-NH <sub>2</sub>                                                              | H4R3me2s                                       |
| 75  | H4 1-23  | Ac-SGR(Me)GKGGKGLGKGGAKRHRKVLR-K(Biot)-NH <sub>2</sub>                                                                             | H4R3me1                                        |
| 76  | H4 1-23  | Ac-pSGR(Me <sub>2</sub> a)GKGGKGLGKGGAKRHRKVLR-K(Biot)-NH <sub>2</sub>                                                             | H4S1p + R3me2a                                 |
| 77  | H4 1-23  | Ac-pSGR(Me <sub>2</sub> s)GKGGKGLGKGGAKRHRKVLR-K(Biot)-NH <sub>2</sub>                                                             | H4S1p + R3me2s                                 |
| 78  | H4 1-23  | Ac-pSGR(Me)GKGGKGLGKGGAKRHRKVLR-K(Biot)-NH <sub>2</sub>                                                                            | H4S1p + R3me1                                  |
| 79  | H4 1-23  | Ac-SGR(Me <sub>2</sub> a)GK(Ac)GGK(Ac)GLGK(Ac)GGAK(Ac)RHRK(Ac)VLR-K(Biot)-NH <sub>2</sub>                                          | H4R3me2a + K5ac + K8ac + K12ac + K16ac + K20ac |
| 80  | H4 1-23  | Ac-SGR(Me <sub>2</sub> s)GK(Ac)GGK(Ac)GLGK(Ac)GGAK(Ac)RHRK(Ac)VLR-K(Biot)-NH <sub>2</sub>                                          | H4R3me2s + K5ac + K8ac + K12ac + K16ac + K20ac |
| 81  | H4 1-23  | Ac-SGR(Me)GK(Ac)GGK(Ac)GLGK(Ac)GGAK(Ac)RHRK(Ac)VLR-K(Biot)-NH <sub>2</sub>                                                         | H4R3me1 + K5ac + K8ac + K12ac + K16ac + K20ac  |
| 82  | H4 11-27 | Ac-GKGGAKRHRK(Me <sub>3</sub> )VLRDNIQ-Peg-Biot                                                                                    | H4K20me3                                       |
| 83  | H4 11-27 | Ac-GKGGAKRHRK(Me <sub>2</sub> )VLRDNIQ-Peg-Biot                                                                                    | H4K20me2                                       |
| 84  | H4 11-27 | Ac-GKGGAKRHRK(Me)VLRDNIQ-Peg-Biot                                                                                                  | H4K20me1                                       |
| 85  | H4 11-27 | Ac-GK(Ac)GGAK(Ac)RHRK(Me <sub>3</sub> )VLRDNIQ-Peg-Biot                                                                            | H4K12ac + K16ac + K20me3                       |
| 86  | H4 11-27 | Ac-GK(Ac)GGAK(Ac)RHRK(Me <sub>2</sub> )VLRDNIQ-Peg-Biot                                                                            | H4K12ac + K16ac + K20me2                       |
| 89  | H3 1-20  | ARTK(Me <sub>3</sub> )QTAR(Me <sub>2</sub> s)K(Me <sub>3</sub> )STGGKAPRKQL-K(Biot)-NH <sub>2</sub>                                | H3K4me3 + R8me2s + K9me3                       |
| 90  | H3 15-43 | Ac-APRK <sup>18</sup> QLATK <sup>23</sup> AARK <sup>27</sup> SAPSTGGVK <sup>36</sup> K <sup>37</sup> PHRYGGK(Biot)-NH <sub>2</sub> | H3 (15-41)                                     |
| 91  | H3 15-43 | Ac-APRK(Me <sub>3</sub> )QLATKAARKSAPSTGGVKKPHRY-GG-K(Biot)-NH <sub>2</sub>                                                        | H3K18me3                                       |
| 93  | H3 15-43 | Ac-APRKQLATKAARKSAPSTGGVKK(Me <sub>3</sub> )KPHRY-GG-K(Biot)-NH <sub>2</sub>                                                       | H3K36me3                                       |
| 95  | H3 15-43 | Ac-APRK(Me <sub>3</sub> )QLATKAARKSAPSTGGVKK(Me <sub>3</sub> )KPHRY-GG-K(Biot)-NH <sub>2</sub>                                     | H3K18me3 + K36me3                              |
| 96  | H3 1-20  | ARTK(Me <sub>3</sub> )QTAR(Me <sub>2</sub> a)K(Me <sub>3</sub> )STGGKAPRKQL-K(Biot)-NH <sub>2</sub>                                | H3K4me3 + R8me2a + K9me3                       |
| 99  | H4 11-27 | Ac-GKGGAKRHRKVLRDNIQ-Peg-Biot                                                                                                      | H4 (11-27)                                     |
| 100 | H3 74-84 | Ac-IAQDFKTDLRF-Peg-K(Biot)-NH <sub>2</sub>                                                                                         | H3 (74-84) N-ac                                |
| 101 | H3 74-84 | Ac-IAQDFK(Me <sub>3</sub> )TDLRF-Peg-K(Biot)-NH <sub>2</sub>                                                                       | H3K79me3                                       |
| 102 | H3 74-84 | Ac-IAQDFK(Me <sub>2</sub> )TDLRF-Peg-K(Biot)-NH <sub>2</sub>                                                                       | H3K79me2                                       |

|     |            |                                                                                                                     |                                         |
|-----|------------|---------------------------------------------------------------------------------------------------------------------|-----------------------------------------|
| 103 | H3 74-84   | Ac-IAQDFK(Me)TDLRF-Peg-K(Biot)-NH <sub>2</sub>                                                                      | H3K79me1                                |
| 104 | H3 74-84   | IAQDFKTDLRF-Peg-K(Biot)-NH <sub>2</sub>                                                                             | H3 (74-84)                              |
| 121 | H3 27-45   | KSAPSTGGVK(Me <sub>2</sub> )KPHRYKPGT-GG-K(Biot)-NH <sub>2</sub>                                                    | H3K36me2                                |
| 123 | H3 27-45   | KSAPSTGGVK(Ac)KPHRYKPGT-GG-K(Biot)-NH <sub>2</sub>                                                                  | H3K36ac                                 |
| 124 | H3 27-45   | KSAPSTGGVKKPHRYKPGT-GG-K(Biot)-NH <sub>2</sub>                                                                      | H3 (27-45)                              |
| 132 | H3 1-20    | ARTK(Me <sub>3</sub> )QTARK(Me <sub>3</sub> )STGGKAPRKQL-K(Biot)-NH <sub>2</sub>                                    | H3K4me3 + K9me3                         |
| 133 | H3 1-20    | ARTKQTARK(Me <sub>2</sub> )STGGKAPRKQL-K(Biot)-NH <sub>2</sub>                                                      | H3K9me2                                 |
| 134 | H3 1-20    | ARTKQTARK(Me)STGGKAPRKQL-K(Biot)-NH <sub>2</sub>                                                                    | H3K9me1                                 |
| 137 | H3 1-20    | ARTKQTARKSTGGKAPRK(Me <sub>3</sub> )QL-K(Biot)-NH <sub>2</sub>                                                      | H3K18me3                                |
| 138 | H3 1-20    | ARTKQTARKSTGGKAPRK(Me <sub>2</sub> )QL-K(Biot)-NH <sub>2</sub>                                                      | H3K18me2                                |
| 139 | H3 1-20    | ARTKQTARKSTGGKAPRK(Me)QL-K(Biot)-NH <sub>2</sub>                                                                    | H3K18me1                                |
| 144 | H3 1-20    | ARTKQTARK(Ac)pSTGGKAPRKQL-K(Biot)-NH <sub>2</sub>                                                                   | H3K9ac + S10p                           |
| 145 | H3 1-20    | ARTKQTARK(Me <sub>3</sub> )pSTGGKAPRKQL-K(Biot)-NH <sub>2</sub>                                                     | H3K9me3 + S10p                          |
| 146 | H3 1-20    | ARTKQTARK(Me <sub>2</sub> )pSTGGKAPRKQL-K(Biot)-NH <sub>2</sub>                                                     | H3K9me2 + S10p                          |
| 147 | H3 1-20    | ARTKQTARK(Me)pSTGGKAPRKQL-K(Biot)-NH <sub>2</sub>                                                                   | H3K9me1 + S10p                          |
| 148 | H3 1-20    | ARTK(Me <sub>3</sub> )QTARK(Ac)pSTGGKAPRKQL-K(Biot)-NH <sub>2</sub>                                                 | H3K4me3 + K9ac + S10p                   |
| 149 | H3 1-22    | ARTKQTARKSTGGKAPR(Me <sub>2</sub> a)KQLAT-K(Biot)-NH <sub>2</sub>                                                   | H3R17me2a                               |
| 150 | H3 1-22    | ARTKQTARKSTGGKAPR(Me <sub>2</sub> s)KQLAT-K(Biot)-NH <sub>2</sub>                                                   | H3R17me2s                               |
| 151 | H3 1-22    | ARTKQTARKSTGGKAPR(Me)KQLAT-K(Biot)-NH <sub>2</sub>                                                                  | H3R17me1                                |
| 157 | H3 1-20    | AR(Me <sub>2</sub> s)TK(Me <sub>3</sub> )QTARKSTGGKAPRKQL-K(Biot)-NH <sub>2</sub>                                   | H3R2me2s + K4me3                        |
| 162 | H3 1-20    | ARTKQpTARKSTGGKAPRKQL-K(Biot)-NH <sub>2</sub>                                                                       | H3T6p                                   |
| 163 | H3 1-20    | ARTK(Me <sub>3</sub> )QpTARKSTGGKAPRKQL-K(Biot)-NH <sub>2</sub>                                                     | H3K4me3 + T6p                           |
| 164 | H3 1-20    | ARTK(Me <sub>2</sub> )QpTARKSTGGKAPRKQL-K(Biot)-NH <sub>2</sub>                                                     | H3K4me2 + T6p                           |
| 165 | H3 1-20    | ARTKQpTARK(Ac)STGGK(Ac)APRK(Ac)QL-K(Biot)-NH <sub>2</sub>                                                           | H3T6p + K9ac + K14ac + K18ac            |
| 166 | H3 1-20    | ARTK(Me <sub>3</sub> )QpTAR(Ac)STGGK(Ac)APRK(Ac)QL-K(Biot)-NH <sub>2</sub>                                          | H3K4me3 + T6p + K9ac + K14ac + K18ac    |
| 167 | H3 1-20    | ARTK(Me <sub>2</sub> )QpTAR(Ac)STGGK(Ac)APRK(Ac)QL-K(Biot)-NH <sub>2</sub>                                          | H3K4me2 + T6p + K9ac + K14ac + K18ac    |
| 174 | H3 1-20    | AR(Me <sub>2</sub> s)TK(Me <sub>3</sub> )QTARK(Ac)STGGK(Ac)APRK(Ac)QL-K(Biot)-NH <sub>2</sub>                       | H3R2me2s + K4me3 + K9ac + K14ac + K18ac |
| 178 | H3 1-20    | ARTKQTAR(Me)K(Me <sub>3</sub> )STGGKAPRKQL-K(Biot)-NH <sub>2</sub>                                                  | H3R8me1 + K9me3                         |
| 179 | H3 1-20    | ARTKQTAR(Me)K(Me <sub>2</sub> )STGGKAPRKQL-K(Biot)-NH <sub>2</sub>                                                  | H3R8me1 + K9me2                         |
| 180 | H3 1-20    | ARTKQTAR(Me <sub>2</sub> a)K(Me <sub>3</sub> )STGGKAPRKQL-K(Biot)-NH <sub>2</sub>                                   | H3R8me2a + K9me3                        |
| 181 | H3 1-20    | ARTKQTAR(Me <sub>2</sub> a)K(Me <sub>2</sub> )STGGKAPRKQL-K(Biot)-NH <sub>2</sub>                                   | H3R8me2a + K9me2                        |
| 182 | H3 1-20    | ARTKQTAR(Me <sub>2</sub> a)K(Me)STGGKAPRKQL-K(Biot)-NH <sub>2</sub>                                                 | H3R8me2a + K9me1                        |
| 183 | H3 1-20    | ARTKQTAR(Me <sub>2</sub> s)K(Me <sub>3</sub> )STGGKAPRKQL-K(Biot)-NH <sub>2</sub>                                   | H3R8me2s + K9me3                        |
| 184 | H3 1-20    | ARTKQTAR(Me <sub>2</sub> s)K(Me <sub>2</sub> )STGGKAPRKQL-K(Biot)-NH <sub>2</sub>                                   | H3R8me2s + K9me2                        |
| 185 | H3 1-20    | ARTKQTAR(Me <sub>2</sub> s)K(Me)STGGKAPRKQL-K(Biot)-NH <sub>2</sub>                                                 | H3R8me2s + K9me1                        |
| 186 | H3 1-20    | ARTK(Ac)QTARK(Me <sub>2</sub> )STGGK(Ac)APRK(Ac)QL-K(Biot)-NH <sub>2</sub>                                          | H3K4ac + K9me2 + K14ac + K18ac          |
| 187 | H3 1-20    | ARTK(Ac)QTARK(Me)STGGK(Ac)APRK(Ac)QL-K(Biot)-NH <sub>2</sub>                                                        | H3K4ac + K9me1 + K14ac + K18ac          |
| 195 | H3 15-34   | Ac-APRK <sup>18</sup> QLATK <sup>23</sup> AARK(Me <sub>3</sub> ) <sup>27</sup> SAPSTGG-Peg-Biot                     | H3K27me3                                |
| 196 | H3 15-34   | Ac-APRK <sup>18</sup> QLATK <sup>23</sup> AARK(Me <sub>2</sub> ) <sup>27</sup> SAPSTGG-Peg-Biot                     | H3K27me2                                |
| 197 | H3 15-34   | Ac-APRK <sup>18</sup> QLATK <sup>23</sup> AARK(Me) <sup>27</sup> SAPSTGG--Peg-Biot                                  | H3K27me1                                |
| 198 | H3 15-34   | Ac-APRK <sup>18</sup> QLATK <sup>23</sup> AAR(Me <sub>2</sub> a)K(Me <sub>3</sub> ) <sup>27</sup> SAPSTGG--Peg-Biot | H3R26me2a + K27me3                      |
| 203 | H3 30-49   | Ac-PATGGVKKPHRYRPGTVALR-Peg-K(Biot)-NH <sub>2</sub>                                                                 | H3 (30-49)                              |
| 209 | H3.3 15-34 | Ac-APRKQLATKAARKSAPSTGG-Peg-K(Biot)-NH <sub>2</sub>                                                                 | H3.3 (15-34)                            |
| 210 | H3 30-49   | Ac-PSTGGVKKPHRYRPGTVALR-Peg-K(Biot)-NH <sub>2</sub>                                                                 | H3.3 (30-49)                            |
| 211 | H3.3 75-94 | Ac-AQDFKTDLRFQSAAGALQE-Peg-K(Biot)-NH <sub>2</sub>                                                                  | H3.3 (75-94)                            |
| 213 | H3 120-135 | (Biot)Peg-MPKDIQLARRIRGERA-OH                                                                                       | H3 (120-135)                            |
| 220 | H3 1-20    | ARTKQpTARK(Me <sub>3</sub> )STGGKAPRKQL-K(Biot)-NH <sub>2</sub>                                                     | H3T6p + K9me3                           |
| 221 | H3 1-20    | ARTKQpTAR(Me <sub>2</sub> a)K(Me <sub>3</sub> )STGGKAPRKQL-K(Biot)-NH <sub>2</sub>                                  | H3T6p + R8me2a + K9me3                  |

|     |            |                                                                                                  |                                          |
|-----|------------|--------------------------------------------------------------------------------------------------|------------------------------------------|
| 225 | H3 15-34   | Ac-APRK <sup>18</sup> QLATK <sup>23</sup> AARK(Me <sub>3</sub> ) <sup>27</sup> pSAPSTGG-Peg-Biot | H3K27me3 + S28p                          |
| 226 | H3 15-34   | Ac-APRK <sup>18</sup> QLATK <sup>23</sup> AARK(Me <sub>2</sub> ) <sup>27</sup> pSAPSTGG-Peg-Biot | H3S27me2 + S28p                          |
| 229 | H3 1-20    | ARTK(Ac)QTARK(Me <sub>3</sub> )STGGKAPRKQL-K(Biot)-NH <sub>2</sub>                               | H3K4ac + K9me3                           |
| 237 | H3 1-32    | ARTKQTARK(Me <sub>2</sub> )STGGKAPRKQLATKAARKSAPAT-Peg-Biot                                      | H3K9me2 (1-32)                           |
| 300 | H2A 1-17   | Ac-SGRGKQGGKARAKAKTR-Peg-Biot                                                                    | H2A (1-17)                               |
| 301 | H2A 1-17   | Ac-SGRGK(Ac)QGGK(Ac)ARAK(Ac)AK(Ac)TR-Peg-Biot                                                    | H2AK5ac + K9ac + K13ac + K15ac           |
| 302 | H2A 1-17   | Ac-SGRGK(Ac)QGGKARAKAKTR-Peg-Biot                                                                | H2AK5ac                                  |
| 303 | H2A 1-17   | Ac-pSGRGK(Ac)QGGKARAKAKTR-Peg-Biot                                                               | H2AS1p + K5ac                            |
| 304 | H2A 1-17   | Ac-SGR(Me <sub>2</sub> a)GK(Ac)QGGKARAKAKTR-Peg-Biot                                             | H2AR3me2a + K5ac                         |
| 305 | H2A 1-17   | Ac-pSGR(Me <sub>2</sub> a)GK(Ac)QGGKARAKAKTR-Peg-Biot                                            | H2AS1p + R3me2a + K5ac                   |
| 306 | H2A 1-17   | Ac-SGCitGK(Ac)QGGKARAKAKTR-Peg-Biot                                                              | H2ACit3 + K5ac                           |
| 307 | H2A 1-17   | Ac-pSGCitGK(Ac)QGGKARAKAKTR-Peg-Biot                                                             | H2AS1p + Cit3 + K5ac                     |
| 308 | H2A 1-17   | Ac-pSGRGK(Ac)QGGK(Ac)ARAK(Ac)AK(Ac)TR-Peg-Biot                                                   | H2AS1p + K5ac + K9ac + K13ac + K15ac     |
| 309 | H2A 1-17   | SGRGK(Ac)QGGK(Ac)ARAK(Ac)AK(Ac)TR-Peg-Biot                                                       | H2AK5ac + K9ac + K13ac + K15ac (no N-ac) |
| 311 | H2A.X      | Biot-Peg-G <sup>132</sup> KKATQAS <sup>139</sup> QEY <sup>142</sup> -OH                          | H2AX (132-142)                           |
| 312 | H2A.X      | Biot-Peg-G <sup>132</sup> KKATQApS <sup>139</sup> QEY <sup>142</sup> -OH                         | H2AX (S139p)                             |
| 351 | H4 1-23    | SGRGKGGKGLGKGGAKRHRKVLR-Peg-Biot                                                                 | H4 (1-23) (no N-ac)                      |
| 352 | H4 1-23    | Ac-SGRGKGGKGLGKGGAKRHRK(Ac)VLRD-Peg-Biot                                                         | H4K20ac                                  |
| 353 | H4 1-23    | Ac-pSGRGK(Ac)GGK(Ac)GLGK(Ac)GGAK(Ac)RHRKVLR-Peg-Biot                                             | H4S1p + K5ac + K8ac + K12ac + K16ac      |
| 359 | H4 1-23    | Ac-SGRGK(Ac)GGK(Ac)GLGKGGAKRHRKVLR-Peg-Biot                                                      | H4K5ac + K8ac                            |
| 360 | H4 1-23    | Ac-SGRGK(Ac)GGKGLGKGGAK(Ac)RHRKVLR-Peg-Biot                                                      | H4K5ac + K16ac                           |
| 361 | H4 1-23    | Ac-SGRGK(Ac)GGKGLGKGGAKRHRK(Ac)VLR-Peg-Biot                                                      | H4K5ac + K20ac                           |
| 362 | H4 1-23    | Ac-SGRGKGGK(Ac)GLGK(Ac)GGAKRHRKVLR-Peg-Biot                                                      | H4K8ac + K12ac                           |
| 363 | H4 1-23    | Ac-SGRGKGGK(Ac)GLGKGGAKRHRK(Ac)VLR-Peg-Biot                                                      | H4K8ac + K20ac                           |
| 364 | H4 1-23    | Ac-SGRGKGGKGLGK(Ac)GGAK(Ac)RHRKVLR-Peg-Biot                                                      | H4K12ac + K16ac                          |
| 365 | H4 1-23    | Ac-SGRGKGGKGLGK(Ac)GGAKRHRK(Ac)VLR-Peg-Biot                                                      | H4K12ac + K20ac                          |
| 366 | H4 1-23    | Ac-SGRGKGGKGLGKGGAK(Ac)RHRK(Ac)VLR-Peg-Biot                                                      | H4K16ac + K20ac                          |
| 400 | H2B 1-24   | PEPAK <sup>18</sup> SAPAPKKGSKKAVTKAQKK-Peg-Biot                                                 | H2B (1-24)                               |
| 401 | H2B 1-24   | PEPAK(Me <sub>3</sub> )SAPAPKKGSKKAVTKAQKK-Peg-Biot                                              | H2BK5me3                                 |
| 402 | H2B 1-24   | PEPAK(Me <sub>2</sub> )SAPAPKKGSKKAVTKAQKK-Peg-Biot                                              | H2BK5me2                                 |
| 403 | H2B 1-24   | PEPAK(Me)SAPAPKKGSKKAVTKAQKK-Peg-Biot                                                            | H2BK5me1                                 |
| 587 | H2A10-25   | Ac-ARAKAKTRSSRAGLQF-Peg-Biotin                                                                   | H2A (10-25)                              |
| 625 | H2A.X 1-17 | Ac-SGRGKTGGKARAKAKSR-Peg-Biotin                                                                  | H2A.X (1-17)                             |
| 626 | H2A.X 1-17 | Ac-SGRGK(Ac)TGGKARAKAKSR-Peg-Biotin                                                              | H2A.X K5ac                               |



## Supplemental Table 2. Rothbart *et al*

Supplemental Table 2. Details of antibodies tested

| Antibody    | Company      | Catalog # | Host and antibody type | Concentration | Results Location                     | tetra-ac/<br>mono-ac<br>( $\pm$ s.e.m.) |
|-------------|--------------|-----------|------------------------|---------------|--------------------------------------|-----------------------------------------|
| H3K9ac      | Millipore    | 07-352    | Rabbit polyclonal      | 1:1000        | Fig. 1a<br>Supp. Fig. 1              | 1.8 $\pm$ 0.3                           |
| H3K14ac     | Millipore    | 07-353    | Rabbit polyclonal      | 1:1000        | Fig. 1a<br>Supp. Fig. 1              | 1.1 $\pm$ 0.2                           |
| H4K5ac      | Active Motif | 39169     | Rabbit polyclonal      | 1:1000        | Fig. 1b-c<br>Fig. 2c<br>Supp. Fig. 2 | 4.0 $\pm$ 0.3                           |
| H4K5ac      | Millipore    | 07-327    | Rabbit polyclonal      | 1:1000        | not shown                            | 15.9 $\pm$ 4.1                          |
| H4K8ac      | Active Motif | 39172     | Rabbit polyclonal      | 1:1000        | Fig. 1b-c<br>Supp. Fig. 2            | 21.9 $\pm$ 5.0                          |
| H4K12ac     | Active Motif | 39165     | Rabbit polyclonal      | 1:1000        | Fig. 1b-d<br>Fig. 2b<br>Supp. Fig. 2 | 18.6 $\pm$ 2.1                          |
| H4K12ac     | Millipore    | 04-119    | Rabbit monoclonal      | 1:1000        | not shown                            | 11.2 $\pm$ 2.5                          |
| H4K12ac     | Millipore    | 07-595    | Rabbit polyclonal      | 1:1000        | not shown                            | 2.8 $\pm$ 0.2                           |
| H4K16ac     | Active Motif | 39168     | Rabbit polyclonal      | 1:2500        | Fig. 1b-c<br>Supp. Fig. 2            | 1.7 $\pm$ 0.3                           |
| H4 tetra-ac | Active Motif | 39179     | Rabbit polyclonal      | 1:2000        | Fig. 1b-c<br>Supp. Fig. 2            | n/a                                     |

## **SUPPLEMENTAL FIGURE LEGENDS**

**Supplemental Figures 1-2.** Expanded heat map of peptide array results for H3 acetyl antibodies (Supplemental Fig. 1) and H4 acetyl antibodies (Supplemental Fig. 2). For each array, the most intense series of peptide spots (12 individual spots per peptide) is assigned a value of 1 (blue), and all values are normalized to this peptide. Each interaction is presented as an averaged normalized intensity from at least two independent arrays ( $r^2 > 0.9$ ).

**Supplemental Figure 3.** Quantitative mass spectrometry of the histone H4 tail (amino acids 3-17) across species. Error is represented as standard deviations from three biological replicates.
